# Supplementary material for: DNA Methylation Profiles and Their Relationship with Cytogenetic Status in Adult Acute Myeloid Leukemia
Source: PLoS One. 2010 Aug 16;5(8):e12197. doi: 10.1371/journal.pone.0012197 (PMC2922373; doi:10.1371/journal.pone.0012197)
Supplement: Table S2 — Methylation values for the statistically significant probes (0.07 MB XLS) [file pone.0012197.s003.xls]

## Sheet: Hoja1
ID Probe	**CpG island	Chr.	GENE NAME	Db value	FDR_indep	Db value	FDR_indep	Db value	FDR_indep	Db value	FDR_indep	Db value	FDR_indep	Db value	FDR_indep	Db value	FDR_indep	Db value	FDR_indep	Db value	FDR_indep	Db value	FDR_indep	Db value	FDR_indep
CD34_P339_R	N	1	CD34 antigen isoform a	-0.051884	0.122197	-0.056533	0.380209	0.380052	0.0106455	0.326395	0.12889	0.562888	0.0007392	-0.0566716	0.450714	-0.111499	0.0060737	-0.0924202	0.0099416	0.575189	0.0009683	0.527874	0.0062553	0.487248	0.0064288
CD34_P780_R	N	1	CD34 antigen isoform a	-0.0211753	0.58177	-0.061729	0.134975	0.312418	0.0159719	0.272453	0.159882	0.21519	0.0135684	-0.0848521	0.028785	-0.101552	0.0066117	-0.0948217	0.0099416	0.536107	0.0009683	0.328787	0.0131781	0.318598	0.0233327
HLA-DPA1_E35_R	N	6	major histocompatibility complex, class II, DP alpha 1 precursor	-0.0722167	0.410202	-0.216786	0.0248659	-0.0142055	0.840707	0.0160904	0.991231	-0.186392	0.035566	-0.2109	0.0022652	-0.157187	0.0682814	-0.214686	0.0051489	0.334902	0.0063452	-0.0641959	0.616292	-0.0846317	0.574673
AHR_P166_R	Y	7	aryl hydrocarbon receptor	-0.0144919	0.0434868	-0.0235678	0.0110564	0.325448	0.0192603	0.156772	0.441825	0.0437637	1	0.00519417	0.885032	-0.0215785	0.0027788	-0.0204931	0.0051489	0.439759	0.0042545	0.201508	0.496549	-0.0209858	0.0233327
TNFSF8_E258_R	N	9	tumor necrosis factor (ligand) superfamily, member 8	-0.0480494	0.41128	-0.0636292	0.0839256	0.410042	0.0175021	0.335843	0.275471	-0.0482413	0.258639	-0.0654531	0.0169814	-0.0555531	0.141955	-0.0623196	0.062951	0.0333316	0.622944	-0.0552746	0.130025	-0.0397214	0.581622
CDKN1C_P626_F	Y	11	cyclin-dependent kinase inhibitor 1C	0.342314	0.0031966	-0.00201712	0.941928	0.341596	0.0024092	-0.0231082	0.0301579	-0.0303602	0.0007392	0.0276515	0.989111	0.10517	0.297599	-0.0222168	0.0338021	0.405598	0.0173147	0.378469	0.0212608	0.00118317	0.9987
GNMT_E126_F	Y	6	glycine N-methyltransferase	0.185211	0.0056448	0.00323957	0.595151	0.286176	0.0130037	0.00324144	0.755959	-0.00232173	0.696267	0.0461268	0.122285	0.312453	0.0343619	0.0147572	0.329999	0.366771	0.0072421	0.433901	0.0062553	0.0343838	0.65512
GNMT_P197_F	Y	6	glycine N-methyltransferase	0.275602	0.0034275	0.00198462	0.96972	0.427768	0.0014948	0.066275	0.677217	-0.00296758	0.964811	0.180316	0.106666	0.401806	0.0391048	0.202389	0.0311473	0.506459	0.0040964	0.565898	0.0062553	0.0819821	0.65512
GUCY2D_E419_R	Y	17	guanylate cyclase 2D, membrane (retina-specific)	0.271228	0.0054439	-0.0100663	0.10827	0.241432	0.018607	0.108102	0.441825	-0.00849364	0.074247	-0.00945	0.0599258	0.14637	0.233927	0.048461	0.971768	0.237326	0.0821864	0.289532	0.222097	-0.0050275	0.518101
ASCL2_P609_R	Y	11	achaete-scute complex homolog-like 2	0.426904	0.0011499	0.0551126	0.595151	0.507472	0.0014948	0.0467639	0.677217	-0.0256017	0.670491	-0.0631397	0.0298814	0.173776	0.204803	0.251815	0.220863	0.0565653	0.23387	0.214951	0.225312	0.125976	0.420371
CD9_P585_R	Y	12	CD9 antigen	0.218683	0.0195727	-0.0473497	0.742411	0.163323	0.0681297	-0.168214	0.171737	-0.179946	0.0159005	-0.126741	0.0997808	0.219859	0.0580267	-0.0817844	0.532064	-0.111397	0.176002	0.0114289	0.9351	-0.166302	0.0146249
COL1A1_P5_F	Y	17	alpha 1 type I collagen preproprotein	0.322521	0.0015479	0.0543584	0.595151	0.308306	0.0132235	0.0202207	0.991231	0.00968383	0.913016	-0.0786768	0.122285	0.249166	0.0941832	-0.0315706	0.662107	0.243309	0.0448523	0.28256	0.0828771	0.0289875	0.9987
ACVR1_E328_R	N	2	activin A type I receptor precursor	-0.174476	0.0022724	-0.0714509	0.434405	-0.1692	0.0214795	-0.580742	0.0117861	-0.501146	0.0007392	-0.391983	0.0051651	-0.107773	0.207135	0.0370846	0.108468	-0.183687	0.0093969	-0.241586	0.0467003	-0.500217	0.0182288
BCR_P346_F	Y	22	breakpoint cluster region isoform 2	-0.400735	0.009093	-0.255857	0.165705	-0.0956001	0.28516	-0.463342	0.0121557	-0.619844	0.0007392	-0.346157	0.0041848	-0.0912956	0.433355	0.0241687	0.791094	-0.122853	0.478475	-0.223553	0.0951861	-0.675281	0.0044557
AXL_P223_R	Y	19	AXL receptor tyrosine kinase isoform 1	0.21526	0.0212366	0.0513206	0.711762	0.283397	0.0005749	0.0293208	0.970105	-0.0623919	0.576676	-0.301666	0.0036312	0.0893814	0.380947	0.232033	0.0051489	0.146342	0.227389	0.228261	0.0062553	-0.0561551	0.725119
MAP3K8_P1036_F	Y	10	mitogen-activated protein kinase kinase kinase 8	-0.0549336	0.570817	-0.194202	0.132422	0.0871908	0.28744	-0.187675	0.297356	-0.208134	0.157119	-0.391357	0.0205938	-0.0935801	0.433355	-0.157147	0.374435	-0.418682	0.0026477	-0.0697967	0.486085	-0.243627	0.200376
OGG1_E400_F	Y	3	8-oxoguanine DNA glycosylase isoform 2d	0.122928	0.100406	-0.0679441	0.578009	0.284602	0.0005749	-0.192949	0.23369	-0.264837	0.0546872	-0.114424	0.347329	0.14228	0.233927	0.1585	0.227954	-0.00236489	0.979377	0.230164	0.0180729	-0.299213	0.0465039
ERN1_P809_R	Y	17	endoplasmic reticulum to nucleus signalling 1 isoform 1	0.0243851	0.792642	0.0386197	0.736613	0.43968	0.0005749	0.0751385	0.744517	-0.217857	0.0524196	-0.190764	0.0074741	0.106938	0.334066	0.178072	0.243671	0.401655	0.0080686	-0.0161065	0.930884	-0.129351	0.401401
PTPN6_P282_R	N	12	protein tyrosine phosphatase, non-receptor type 6 isoform 2	0.0856735	0.491095	0.3378	0.0248659	0.42415	0.0007392	0.301184	0.128843	0.0207705	0.909705	0.0449518	0.696831	0.209325	0.124678	0.414231	0.0099416	0.509732	0.0009683	0.246956	0.118623	0.0490504	0.806271
ALOX12_E85_R	Y	17	arachidonate 12-lipoxygenase	0.509504	0.0011499	0.435859	0.0186215	0.468004	0.0016364	0.0532644	0.90818	-0.0967667	0.474681	0.445268	0.0004271	0.496942	0.0063523	0.591751	0.0051489	0.566692	0.0009683	0.571878	0.0062553	0.430769	0.0233327
ALOX12_P223_R	Y	17	arachidonate 12-lipoxygenase	0.564043	0.0011499	0.513189	0.0110564	0.544064	0.0016203	0.137645	0.585187	0.0648035	0.591778	0.498851	0.0004271	0.565211	0.0028945	0.652136	0.0051489	0.630434	0.0009683	0.62386	0.0062553	0.47613	0.0233327
KCNK4_E3_F	Y	11	potassium channel, subfamily K, member 4 isoform 1	0.412381	0.0007666	0.086776	0.6144	0.354833	0.0014948	0.0950415	0.657927	-0.0822087	0.112629	0.4515	0.0004271	0.394181	0.0094026	0.282436	0.0051489	0.422687	0.0035518	0.234711	0.0318556	0.074159	0.574673
EPHA2_P203_F	Y	1	ephrin receptor EphA2	0.167603	0.0576348	-0.0870018	0.502442	0.0332271	0.655552	-0.32054	0.0068992	-0.321729	0.0109436	-0.16866	0.0684826	0.140376	0.122783	-0.0118805	0.921034	0.0131369	0.901903	-0.129914	0.291041	-0.0929711	0.574673
DDR1_P332_R	N	6	discoidin domain receptor family, member 1 isoform b	0.0369519	0.41128	-0.256486	0.0443551	-0.0373327	0.42338	-0.257109	0.0198672	-0.432133	0.0094248	-0.676807	0.0004271	-0.16907	0.110222	-0.0603057	0.205767	-0.0759549	0.432966	-0.516244	0.0062553	-0.369929	0.0233327
HPN_P823_F	N	19	hepsin (transmembrane protease, serine 1)	0.350886	0.0011499	0.22218	0.200354	0.249228	0.0159719	0.0323083	0.970105	-0.0951719	0.392971	-0.311621	0.0153173	0.14694	0.32088	0.357274	0.0051489	0.167182	0.192041	0.0100495	0.938177	0.0206458	0.975606
AXIN1_P995_R	Y	16	axin 1 isoform a	0.069485	0.392646	-0.219658	0.134975	0.0103883	0.894907	-0.405815	0.0068992	-0.443919	0.0031114	-0.289243	0.0280221	0.00162722	0.990596	-0.117328	0.543663	0.0779116	0.525093	-0.160111	0.341744	-0.35935	0.0240322
FGFR3_P1152_R	Y	4	fibroblast growth factor receptor 3 isoform 2 precursor	0.24416	0.0017887	-0.0451554	0.760391	0.258303	0.0024092	-0.0273716	0.970105	-0.132758	0.278548	0.0391999	0.653782	0.189534	0.0682633	0.198606	0.174928	0.270201	0.013763	0.207704	0.0467003	-0.0460515	0.806271
MST1R_E42_R	Y	3	macrophage stimulating 1 receptor	-0.0295477	0.48036	-0.352649	0.0110564	0.0638408	0.0241583	-0.162726	0.275471	-0.322525	0.0035071	-0.342016	0.0041707	-0.0541318	0.677618	-0.17366	0.243671	0.0365021	0.468839	-0.0185722	0.894628	-0.517813	0.0044557
RARA_P176_R	N	17	retinoic acid receptor, alpha isoform a	0.26657	0.0017586	0.170968	0.226288	0.340609	0.0080491	0.00992211	0.991231	-0.109888	0.103337	-0.129696	0.0188756	0.0444249	0.569141	0.368303	0.0585085	0.28285	0.0216339	0.0981367	0.384124	-0.124111	0.0307179
GRB7_P160_R	N	17	growth factor receptor-bound protein 7	0.311512	0.0015479	-0.132011	0.160981	0.178066	0.0739109	0.00779583	1	-0.161224	0.103577	-0.164585	0.0365942	0.133714	0.110222	-0.090125	0.411172	0.144694	0.0950096	0.181741	0.130134	0.0563558	0.734702
MET_E333_F	Y	7	met proto-oncogene precursor	0.28961	0.0038461	-0.150563	0.32352	0.221597	0.0314261	0.0115243	1	-0.198178	0.0564371	-0.107423	0.323424	0.0254636	0.855444	-0.100962	0.467469	0.212786	0.0584811	0.102196	0.391607	-0.211896	0.0949083
AXL_E61_F	N	19	AXL receptor tyrosine kinase isoform 1	0.478428	0.0022135	0.234667	0.134975	0.530544	0.0017248	0.344444	0.179172	0.17979	0.169597	-0.0465032	0.0013498	0.352658	0.0169009	0.562696	0.0051489	0.367489	0.0434226	0.662155	0.0062553	0.0873003	0.392002
NPR2_P618_F	Y	9	natriuretic peptide receptor B precursor	0.356096	0.002209	-0.119652	0.0443551	0.395237	0.0005749	-0.088416	0.119435	-0.00210533	0.987948	-0.0165504	0.885032	0.107987	0.311021	0.0942867	0.686017	0.0687177	0.603056	0.342892	0.0418624	0.107761	0.574673
GRB7_E71_R	N	17	growth factor receptor-bound protein 7	0.289842	0.0112322	0.011131	0.941928	0.0852081	0.35283	-0.0881322	0.284169	-0.125166	0.0524196	0.0534238	0.613792	0.216551	0.0546187	-0.0546291	0.315982	0.109021	0.326656	0.359314	0.0286791	-0.0278078	0.958531
TNK1_P41_R	Y	17	tyrosine kinase, non-receptor, 1	0.138545	0.0905439	-0.0502358	0.245219	0.189448	0.0756436	-0.0972889	0.0068992	-0.0819007	0.0150781	-0.0576662	0.0698225	0.220307	0.0682633	0.118162	0.763655	0.351116	0.0217341	0.257853	0.108189	-0.000197875	0.9987
POMC_P400_R	Y	2	proopiomelanocortin	0.36044	0.0015479	0.220651	0.238722	0.2687	0.0214795	-0.0330613	0.744517	-0.0719157	0.0617179	-0.0742518	0.0154387	0.205048	0.0798008	0.00884963	0.905292	0.139055	0.22185	-0.0337525	0.391607	-0.0448899	0.518101
BMP4_P199_R	Y	14	bone morphogenetic protein 4 preproprotein	0.0536687	0.361887	0.363985	0.0179667	0.0945175	0.221472	-0.0468946	0.788956	0.0135808	0.913016	-0.0148072	0.87233	0.363205	0.0145171	0.288632	0.062951	0.156481	0.156726	0.27183	0.0393351	0.0204836	0.98157
DSC2_E90_F	Y	18	desmocollin 2 isoform Dsc2a preproprotein	0.325767	0.0052671	0.19032	0.13675	0.164647	0.0704943	-0.133243	0.0114987	0.248517	0.0617179	0.255239	0.0922388	0.585846	0.0018069	0.388825	0.0051489	-0.0928371	0.0172995	0.349455	0.017248	-0.0941645	0.0138805
FGF2_P229_F	Y	4	fibroblast growth factor 2	0.417093	0.0007666	0.186614	0.0750677	0.307937	0.0024092	0.0959819	0.487632	-0.028955	0.187558	0.482999	0.0004271	0.486421	0.0030269	0.0426887	0.43678	0.0683633	0.303763	0.11574	0.391607	0.0222928	0.701581
CDKN2B_seq_50_S294_F	Y	9	cyclin-dependent kinase inhibitor 2B isoform 1	0.309463	0.0026395	0.12318	0.065812	0.326088	0.0030837	0.0912068	0.487632	0.134483	0.0470084	0.652855	0.0004271	0.453405	0.0018069	0.543054	0.0051489	0.448118	0.0034763	0.375833	0.0866363	0.00209813	0.9987
NEFL_P209_R	Y	8	neurofilament, light polypeptide 68kDa	0.164117	0.0111681	0.197997	0.238722	0.25335	0.0060023	0.0116143	0.991231	0.0588231	0.428294	0.703282	0.0032823	0.46751	0.257633	0.498954	0.244039	0.37265	0.0009683	0.39489	0.0062553	0.130266	0.400005
AGXT_P180_F	N	2	alanine-glyoxylate aminotransferase	-0.0684658	0.0611529	-0.0639262	0.658535	-0.333464	0.0817843	-0.342117	0.0287467	-0.676269	0.0007392	-0.243398	0.251062	-0.0394914	0.247797	-0.0537489	0.850702	-0.594788	0.0022678	-0.661177	0.0081517	-0.463331	0.0064288
AIM2_P624_F	N	1	absent in melanoma 2	0.0215744	0.855367	0.0524261	0.0322963	-0.25007	0.206409	-0.315493	0.108267	-0.57229	0.0007392	0.104702	0.0004271	0.107944	0.0560307	0.0226233	0.667111	-0.524321	0.0009683	-0.589732	0.105071	-0.475318	0.0069471
HOXB2_P488_R	N	17	homeo box B2	-0.0297392	0.630491	-0.243528	0.578009	-0.0775354	0.337742	-0.210103	0.0832011	-0.596072	0.0007392	0.146171	0.0004271	0.0765405	0.48347	-0.0950219	0.740074	0.159882	0.0038288	-0.3339	0.124761	-0.095804	0.574673
HOXB2_P99_F	Y	17	homeo box B2	0.00802394	0.929093	-0.0814834	0.854341	-0.0786211	0.258769	-0.272731	0.0117861	-0.345149	0.0007392	0.302469	0.14144	0.0666967	0.88689	0.0592862	0.106199	0.310602	0.820915	-0.188708	0.266291	-0.114627	0.438452
GPATC3_P410_R	N	1	G patch domain containing 3	-0.215853	0.0347672	-0.0387946	0.380209	-0.0956337	0.539634	-0.198539	0.324109	-0.382741	0.0034815	-0.165823	0.0147095	-0.0213171	0.941146	-0.224987	0.423512	-0.0297823	0.0248739	-0.154867	0.271165	-0.163856	0.41356
CFTR_P372_R	Y	7	cystic fibrosis transmembrane conductance regulator, ATP-binding cassette (sub-family C, member 7)	0.119107	0.196421	-0.101799	0.239059	-0.0428506	0.300377	0.0373996	0.970105	-0.0976726	0.250417	0.29742	0.113388	-0.00908722	0.0180425	0.0901849	0.763655	0.244487	0.0361431	0.153019	0.0957038	-0.0216983	0.97146
CALCA_E174_R	Y	11	calcitonin isoform CALCA preproprotein	0.409282	0.0029747	0.213933	0.924277	0.100294	0.512069	0.191117	0.40109	0.178073	0.248024	0.234664	0.656482	0.376232	0.122783	-0.0223961	0.740074	0.362263	0.467479	0.346936	0.0418624	0.284232	0.107779
CTSL_P264_R	Y	9	cathepsin L preproprotein	0.23315	0.0035112	0.0124769	0.919346	0.0408079	0.342073	0.00359189	1	-0.120836	0.100394	0.0517428	0.0978688	0.184011	0.399832	-0.0444979	0.0051489	0.0786516	0.0173147	0.297228	0.0089899	0.355168	0.0064288
IGFBP1_P12_R	Y	7	insulin-like growth factor binding protein 1 isoform b precursor	0.213136	0.0331094	0.0192565	0.980532	0.082578	0.230307	-0.0298758	0.970105	-0.164902	0.0738731	0.23688	0.108292	0.108994	0.0956556	0.471025	0.667111	0.217852	0.132215	0.386645	0.341744	0.120323	0.344374
DLC1_E276_F	N	8	deleted in liver cancer 1 isoform 1	0.266613	0.0249751	0.0361771	0.595151	0.100553	0.570578	0.0431981	0.970105	0.123153	0.298323	0.179399	0.890386	0.197583	0.588501	0.0338567	0.667111	0.176824	0.903266	0.136218	0.746654	0.0807634	0.65512
HOXA5_P1324_F	Y	7	homeobox A5	-0.00331956	0.977393	-0.0873315	0.629588	0.0412015	0.818716	0.0621385	0.771448	-0.180316	0.133488	0.0175707	0.840234	-0.0626486	0.990596	-0.063178	0.405556	0.0145078	0.84616	0.0415135	0.877183	-0.271698	0.0358375
DLC1_P88_R	N	8	deleted in liver cancer 1 isoform 1	0.211245	0.0172863	0.0782517	0.629588	0.0168403	0.0352413	0.0891049	0.64129	-0.192285	0.0037234	0.0177082	0.696831	-0.00125167	0.008724	0.129854	0.23271	0.0175074	0.669191	-0.0208159	0.341744	-0.226472	0.0358375
MXI1_P1269_F	Y	10	MAX interactor 1 isoform a	0.0464723	0.56692	-0.0686996	0.0110564	-0.22729	0.0005749	-0.0672035	0.722983	-0.255479	0.0657581	0.0460555	0.0041707	0.16756	0.0042162	-0.226218	0.0051489	-0.0460593	0.0009683	-0.152818	0.0062553	0.00743575	0.9987
FZD9_E458_F	Y	7	frizzled 9	0.521266	0.0011499	0.439657	0.595151	0.521968	0.656717	0.472923	0.0803581	0.541278	0.0013032	0.511767	0.0148699	0.660904	0.0018069	0.785584	0.0548651	0.696706	0.136266	0.668333	0.105699	0.421115	0.0098181
COL1A2_P407_R	N	7	alpha 2 type I collagen	0.190618	0.0614371	-0.0814033	0.583736	0.0361379	0.35283	-0.0176179	0.991231	0.0303257	0.815576	0.236653	0.0004271	0.279796	0.0036796	0.249877	0.114811	0.183534	0.002174	0.197663	0.0654227	0.105202	0.574673
SLC22A3_P634_F	Y	6	solute carrier family 22 member 3	0.143232	0.0680052	-0.101151	0.338542	-0.0793311	0.309043	-0.0177882	0.991231	-0.0349454	0.7806	0.318814	0.574482	0.283828	0.807471	0.1917	0.508089	0.278761	0.0878106	0.212322	0.056259	0.0646497	0.692338
LTA_E28_R	N	6	lymphotoxin alpha precursor	-0.0296366	0.84222	0.162935	0.0110564	0.134253	0.0105405	0.144444	0.585187	0.0852898	0.576676	-0.0898222	0.0004271	0.0437886	0.0018069	0.140576	0.0548651	0.2105	0.252505	0.251594	0.0318556	0.101704	0.65512
HIC-1_seq_48_S103_R	Y	17	hypermethylated in cancer 1	0.552322	0.0007666	0.640709	0.263584	0.428408	0.221472	0.000132667	1	0.651366	0.0007392	0.675577	0.0997808	0.553295	0.34892	0.505187	0.413581	0.161899	0.310192	0.481356	0.220807	0.297871	0.199637
NTRK1_E74_F	N	1	neurotrophic tyrosine kinase, receptor, type 1 isoform 3	0.126436	0.491095	0.235012	0.62967	0.265841	0.566918	-0.00603667	1	0.115022	0.591778	0.313085	0.106666	0.168811	0.0402362	0.167991	0.0410503	0.216951	0.22185	0.221417	0.341744	-0.0343541	0.9987
TSP50_P137_F	Y	3	testes-specific protease 50	0.277541	0.0249751	0.0819364	0.629588	0.061646	0.0868314	0.110911	0.585187	-0.144025	0.396634	0.197169	0.707274	0.233641	0.943309	0.311438	0.23271	0.173674	0.202262	0.126416	0.188251	0.0417366	0.929022
MMP10_E136_R	N	11	matrix metalloproteinase 10 preproprotein	-0.0459908	0.587091	0.0422645	0.721717	-0.138279	0.0020314	-0.141981	0.430025	-0.183617	0.144726	-0.0456528	0.0997808	-0.00552872	0.390043	0.133308	0.355555	-0.175984	0.851937	-0.183893	0.0104802	-0.055939	0.687224
MEST_P4_F	Y	7	mesoderm specific transcript isoform a	0.129899	0.0953338	0.0748039	0.238722	0.459847	0.0024092	0.0386478	0.63974	0.094412	0.158735	0.230743	0.121874	0.0754253	0.0795429	0.0325843	0.231223	0.0125359	0.627589	0.599202	0.0104802	0.0713055	0.9987
MEST_P62_R	Y	7	mesoderm specific transcript isoform a	0.107787	0.0630128	0.0760103	0.980532	0.410455	0.0192603	0.0189496	0.735522	0.126596	0.154876	0.157026	0.535951	0.210447	0.0500628	0.0738856	0.495492	-0.00662028	0.0120736	0.491079	0.0079827	0.0514208	0.9987
ERG_E28_F	Y	21	v-ets erythroblastosis virus E26 oncogene like isoform 2	0.000497111	0.977393	0.0532633	0.270677	0.34393	0.0005749	-0.0451777	0.12889	0.0952667	0.227618	0.0525896	0.0009199	0.195175	0.0364942	0.170616	0.0311473	0.232382	0.0100243	0.446487	0.0231238	0.0754248	0.9987
VEGFB_P658_F	Y	11	similar to vascular endothelial growth factor B	0.145147	0.0396182	0.037171	0.0110564	0.538678	0.0214795	0.0238799	0.423008	0.0721088	0.307884	0.17943	0.0004271	0.286508	0.0482679	0.192687	0.0051489	0.204317	0.0017018	0.23994	0.0062553	0.0220117	0.469338
KRT13_P676_F	N	17	keratin 13 isoform b	-0.0483124	0.441416	-0.471403	0.0110564	-0.244932	0.250959	-0.38402	0.0147327	-0.543489	0.0007392	-0.610088	0.0004271	-0.229029	0.0795429	-0.549991	0.0051489	-0.272092	0.866286	-0.524419	0.0140571	-0.547229	0.0044557
SOD3_P460_R	N	4	superoxide dismutase 3, extracellular	-0.0447976	0.411679	-0.328402	0.028799	-0.0848909	0.544125	-0.106039	0.494194	-0.483896	0.0007392	-0.516973	0.0004271	-0.174134	0.124678	-0.550605	0.227954	0.0337024	0.0009683	-0.475729	0.0089899	-0.384972	0.0206976
PTK6_E50_F	Y	20	PTK6 protein tyrosine kinase 6	-0.0313037	0.630491	-0.297977	0.380209	-0.043822	0.894907	-0.194159	0.274522	-0.504093	0.0007392	-0.509348	0.0004271	-0.200831	0.552676	-0.173359	0.782793	-0.496247	0.0059729	-0.436504	0.0089899	-0.506093	0.0044557
RAN_P581_R	Y	12	ras-related nuclear protein	0.00230372	0.977393	-0.160315	0.502442	0.0089305	0.856662	-0.131815	0.487632	-0.277774	0.0759927	-0.540817	0.0282495	-0.0733736	0.026665	-0.0384531	0.0051489	-0.45762	0.0035518	-0.362375	0.0089899	-0.234561	0.16632
RUNX3_E27_R	N	1	runt-related transcription factor 3 isoform 1	-0.0679854	0.482877	0.0414551	0.10827	0.0107325	0.364909	0.0358483	0.876186	-0.463753	0.0039096	0.0975052	0.0798317	-0.393736	0.0030269	-0.485772	0.0150058	-0.598304	0.0009683	-0.551088	0.0062553	-0.56238	0.0233327
RUNX3_P247_F	Y	1	runt-related transcription factor 3 isoform 1	-0.0569269	0.587091	-0.234923	0.502442	-0.094878	0.693072	-0.00993678	1	-0.647436	0.0007392	-0.280946	0.121874	-0.510442	0.0028945	-0.522819	0.150018	-0.611272	0.0009683	-0.653884	0.0062553	-0.639869	0.0044557
RUNX3_P393_R	Y	1	runt-related transcription factor 3 isoform 1	-0.0177165	0.849752	-0.150228	0.065812	-0.0357545	0.28744	0.0636936	0.722983	-0.6189	0.0007392	-0.202001	0.0017131	-0.448171	0.417499	-0.29893	0.0051489	-0.560852	0.0009683	-0.644229	0.746996	-0.634046	0.0044557
MPO_E302_R	N	17	myeloperoxidase	0.0741919	0.308816	-0.321266	0.0153179	-0.0963289	0.460185	-0.0971564	0.585187	0.0930115	0.234258	-0.486387	0.0170755	-0.110386	0.238189	-0.518928	0.0051489	-0.545068	0.002174	-0.0394468	0.0140571	0.156582	0.0600646
SEPT9_P58_R	Y	17	septin 9	-0.270647	0.0565735	-0.297714	0.384717	-0.0600463	0.205386	-0.132049	0.275471	-0.230751	0.0546872	-0.368245	0.0009199	-0.158963	0.0145171	-0.633973	0.0187406	-0.571368	0.0153229	-0.396562	0.0334796	-0.362106	0.0683861
TM7SF3_P1068_R	N	12	transmembrane 7 superfamily member 3	-0.0394285	0.722891	-0.134131	0.947347	-0.150585	0.205386	-0.146019	0.487632	-0.483646	0.0015451	-0.449474	0.0031302	-0.332061	0.0078923	-0.344575	0.0913812	-0.391725	0.0057059	-0.384512	0.0629998	-0.192197	0.386878
DCC_P177_F	Y	18	deleted in colorectal carcinoma	0.112248	0.245971	0.0580826	0.027104	0.0931462	0.0429455	0.0699163	0.63974	0.0619832	0.460293	0.309395	0.00098	0.370819	0.0030269	0.0440137	0.0149248	0.304138	0.0009683	0.347659	0.214259	0.232993	0.313339
DCC_P471_R	Y	18	deleted in colorectal carcinoma	0.15908	0.0059793	0.267297	0.120832	0.181843	0.0221519	0.0921781	0.585187	0.0636173	0.554871	0.512847	0.0041848	0.363733	0.0047082	0.275383	0.0311473	0.615368	0.0031621	0.236394	0.0393351	0.0857399	0.400005
IL17RB_E164_R	Y	3	interleukin 17B receptor isoform 1 precursor	0.115836	0.0127139	0.0812606	0.0110564	0.188926	0.0021645	-0.0163466	0.585187	0.0495331	0.261224	0.491108	0.0004271	0.51238	0.0018069	0.213747	0.0051489	0.483037	0.0009683	0.325652	0.0062553	-0.00473812	0.9987
DBC1_P351_R	Y	9	deleted in bladder cancer 1	0.319951	0.0017586	0.440526	0.0186215	0.327616	0.114292	0.215343	0.116648	0.32426	0.0038416	0.857748	0.0004271	0.755687	0.0028945	0.844308	0.0051489	0.848143	0.0009683	0.718764	0.0080278	0.231321	0.0247885
CDH11_P354_R	Y	16	cadherin 11, type 2 preproprotein	0.0579652	0.162245	0.239491	0.0110564	0.12012	0.0117322	-0.0814016	0.585187	0.00340223	0.987948	0.588419	0.0004271	0.417991	0.0018069	0.492334	0.0051489	0.550011	0.0009683	0.457554	0.0062553	0.071609	0.581622
DBC1_E204_F	Y	9	deleted in bladder cancer 1	0.184714	0.0125801	0.423759	0.0110564	0.26893	0.0016364	0.145402	0.239951	0.296997	0.0039096	0.662322	0.0004271	0.609348	0.0018069	0.672814	0.0051489	0.683193	0.0009683	0.593355	0.0062553	0.439964	0.0044557
HS3ST2_E145_R	Y	16	heparan sulfate D-glucosaminyl 3-O-sulfotransferase 2	0.323129	0.0017586	0.460613	0.0110564	0.457271	0.0060023	0.0898707	0.63974	0.415807	0.035566	0.823302	0.0009761	0.733893	0.0018069	0.755133	0.0051489	0.698803	0.004498	0.700358	0.017248	0.252053	0.177561
ZNF215_P71_R	Y	11	zinc finger protein 215	0.0890501	0.113286	0.335094	0.0831536	0.175659	0.0863734	-0.000291278	1	0.333299	0.0086879	0.535082	0.0024801	0.537453	0.0018069	0.499002	0.0051489	0.411218	0.0009683	0.316488	0.0062553	-0.016678	0.574673
HTR1B_E232_R	Y	6	5-hydroxytryptamine (serotonin) receptor 1B	0.144837	0.0715418	0.220221	0.0110564	0.0783124	0.0155527	-0.0383537	0.246413	0.180585	0.103337	0.638962	0.0004271	0.688458	0.0185211	0.673601	0.0051489	0.637408	0.0022152	0.406944	0.237717	0.145478	0.373696
MME_E29_F	Y	3	membrane metallo-endopeptidase	0.0683416	0.0212366	0.207522	0.0689398	0.11139	0.0126137	0.00436922	0.90818	0.021526	0.0820203	0.638964	0.0004271	0.264747	0.0027788	0.508518	0.0051489	0.427892	0.0017018	0.174331	0.0062553	0.00736746	0.4935
DIO3_P674_F	Y	14	deiodinase, iodothyronine, type III	0.125359	0.0059793	0.0812569	0.0110564	0.238147	0.0134876	0.19925	0.116648	0.328497	0.0039096	0.647045	0.0004271	0.506671	0.0027788	0.449734	0.0051489	0.503646	0.0017018	0.602258	0.0573517	0.314632	0.0146249
TUSC3_E29_R	Y	8	tumor suppressor candidate 3 isoform b	0.0736072	0.0369448	0.120314	0.595151	0.169782	0.134744	0.106853	0.0879266	0.220907	0.0229277	0.564899	0.0008857	0.48687	0.0306566	0.302462	0.0188535	0.58258	0.0825775	0.178628	0.171209	0.232895	0.072835
SLC5A8_E60_R	Y	12	solute carrier family 5 (iodide transporter), member 8	0.135376	0.0680052	0.0891047	0.41173	0.126234	0.0776418	0.0278939	0.876186	-0.040512	0.248024	0.461009	0.0004271	0.371037	0.0018069	0.403299	0.0051489	0.227015	0.002174	0.156927	0.0131781	0.329313	0.0436427
CDH13_P88_F	Y	16	cadherin 13 preproprotein	0.242833	0.0031966	0.0660674	0.0750677	0.149869	0.0132235	0.0149113	1	0.0755881	0.516654	0.623459	0.0004271	0.590284	0.0028945	0.417505	0.0051489	0.481672	0.0022678	0.428896	0.0062553	0.217501	0.216562
MOS_E60_R	Y	8	v-mos Moloney murine sarcoma viral oncogene homolog	0.336352	0.0016837	0.321052	0.441088	0.26132	0.172955	0.000717778	1	0.277568	0.0086879	0.752587	0.0004271	0.606208	0.0018069	0.665914	0.20044	0.596144	0.0361431	0.604652	0.0089899	0.40227	0.0044557
ASCL1_P747_F	Y	12	achaete-scute complex homolog-like 1	0.268896	0.0048678	0.104011	0.134975	0.106457	0.282224	0.0644076	0.755959	0.0930002	0.298323	0.415475	0.0009395	0.429873	0.0180425	0.224629	0.0051489	0.3034	0.002174	0.372547	0.017248	-0.00276042	0.9987
IGFBP1_E48_R	Y	7	insulin-like growth factor binding protein 1 isoform b precursor	0.105064	0.172928	0.1583	0.171363	0.0754782	0.0020482	0.0227483	0.970105	-0.126547	0.187558	0.385835	0.0004271	0.331533	0.0018069	0.386436	0.0051489	0.355235	0.002174	0.413076	0.0062553	0.102154	0.561981
MYOD1_E156_F	Y	11	myogenic differentiation 1	0.354374	0.0011499	0.15957	0.0415102	0.280438	0.0553919	0.00531433	0.991231	0.17204	0.0629614	0.715939	0.0004271	0.571709	0.0027788	0.629303	0.0051489	0.347614	0.0105222	0.591944	0.0062553	0.353514	0.0366103
PITX2_E24_R	Y	4	paired-like homeodomain transcription factor 2 isoform c	0.369957	0.0034922	0.237169	0.171363	0.163347	0.0150844	0.195451	0.350217	0.0803816	0.270552	0.634357	0.0004271	0.577876	0.0028945	0.4208	0.0051489	0.432393	0.002174	0.353907	0.0201706	0.260497	0.199637
EYA4_P794_F	Y	6	eyes absent 4 isoform a	0.192342	0.0074741	0.0183997	0.361253	0.229332	0.0093179	0.185829	0.239951	0.110359	0.0820203	0.528333	0.0009761	0.389263	0.0028945	0.275842	0.0723402	0.376271	0.0022152	0.463121	0.0062553	0.102439	0.191721
SOX17_P287_R	Y	8	SRY-box 17	0.212158	0.0104667	0.132454	0.595151	0.300814	0.0175021	0.229692	0.294543	0.174952	0.114814	0.480742	0.0004271	0.490278	0.0028945	0.277068	0.0548651	0.429553	0.0017018	0.619908	0.0062553	0.0167999	0.938468
SOX17_P303_F	Y	8	SRY-box 17	0.139988	0.0434868	0.108027	0.575558	0.216668	0.361851	0.210615	0.23369	0.103201	0.17375	0.48122	0.0025209	0.486694	0.0061662	0.231053	0.0051489	0.333595	0.002174	0.569501	0.0408109	0.0544354	0.832822
ISL1_E87_R	Y	5	islet-1	0.0404633	0.263298	-0.00910214	0.603656	0.0475112	0.0704943	-0.0123134	0.59419	0.0788265	0.262522	0.463427	0.0124599	0.463434	0.0129653	0.189162	0.0187406	0.339553	0.0031758	0.253059	0.23636	0.136065	0.518101
FAT_P279_R	Y	4	FAT tumor suppressor 1 precursor	0.0339218	0.162245	0.0175169	0.0468274	0.109703	0.0362522	-0.0244566	0.275471	0.178649	0.185272	0.466037	0.0015046	0.399545	0.0018069	0.335971	0.0051489	0.493057	0.0017018	0.196865	0.0155232	0.0400583	0.9987
FRZB_E186_R	Y	2	frizzled-related protein	0.07477	0.0531668	0.32269	0.0484478	0.169753	0.0746067	0.00623089	1	0.130846	0.0580553	0.524954	0.0032853	0.682314	0.0018069	0.723888	0.0051489	0.61285	0.0024707	0.470455	0.0334796	0.103158	0.100268
HTR1B_P222_F	Y	6	5-hydroxytryptamine (serotonin) receptor 1B	0.0716378	0.0425656	0.197212	0.140425	0.116401	0.0077174	0.00365544	0.970105	0.0575891	0.248024	0.446311	0.0004271	0.626123	0.0030269	0.496044	0.0051489	0.404544	0.0046105	0.334511	0.0062553	0.0129089	0.581622
CDH13_E102_F	Y	16	cadherin 13 preproprotein	0.107654	0.0061805	0.079474	0.0750677	0.141509	0.0042495	0.0236691	0.441825	0.133069	0.0294062	0.684887	0.0004271	0.442661	0.0028945	0.315339	0.0051489	0.414149	0.0030221	0.592286	0.017248	0.1747	0.0387721
EYA4_E277_F	Y	6	eyes absent 4 isoform a	0.0459447	0.0347672	0.0981448	0.869445	0.0727995	0.479271	0.0929583	0.229797	0.0463845	0.0470084	0.714848	0.0004271	0.457661	0.0196385	0.232005	0.197256	0.503141	0.0037121	0.454158	0.0382529	0.0866891	0.0256591
SLC22A3_E122_R	Y	6	solute carrier family 22 member 3	0.0582438	0.477251	-0.018062	0.229409	0.0594694	0.507234	-0.0206027	0.87995	0.0274934	0.832767	0.65469	0.0008784	0.469853	0.008724	0.130636	0.0051489	0.463163	0.0009683	0.333354	0.056259	0.0473034	0.581622
ISL1_P379_F	Y	5	islet-1	0.0211131	0.264378	0.0548645	0.326963	0.0174358	0.378852	-0.00126717	1	0.0152016	0.439412	0.497894	0.001629	0.432207	0.0030269	0.350125	0.0226886	0.440419	0.0041536	0.39376	0.0382529	0.0464475	0.9987
HS3ST2_P171_F	Y	16	heparan sulfate D-glucosaminyl 3-O-sulfotransferase 2	0.0295387	0.499066	0.0287939	0.384717	0.0290797	0.0993421	-0.0274642	0.0546666	-0.0217478	0.187558	0.573977	0.0009199	0.454831	0.0028945	0.278268	0.0051489	0.327621	0.0031758	0.455259	0.0062553	-0.019415	0.234953
WNT2_P217_F	Y	7	wingless-type MMTV integration site family member 2 precursor	0.0388856	0.0584207	0.0422411	0.491457	0.0962981	0.358753	-0.00911767	0.652716	0.0608944	0.347035	0.55877	0.0004271	0.379776	0.0087708	0.498171	0.0051489	0.445053	0.0093969	0.41676	0.0616986	0.0367045	0.806271
SOX1_P294_F	Y	13	SRY (sex determining region Y)-box 1	0.0379458	0.245971	0.0699817	0.204133	0.0371787	0.0214795	-0.0266253	0.239951	0.101641	0.372041	0.625347	0.0029072	0.475566	0.0055678	0.333928	0.0051489	0.286708	0.0017018	0.322951	0.0193153	0.105715	0.65512
SLIT2_P208_F	Y	4	slit homolog 2	0.172808	0.0015479	0.0850008	0.0750677	0.077504	0.126273	0.0600744	0.657295	0.0403986	0.581345	0.561414	0.0012137	0.615327	0.0028945	0.339939	0.0051489	0.444748	0.0414412	0.550118	0.0418624	0.138489	0.336635
IGSF4_P86_R	Y	11	immunoglobulin superfamily, member 4	0.0522799	0.440936	0.0745059	0.0179667	0.0645354	0.0602609	0.10472	0.677217	0.115561	0.096525	0.56797	0.0004271	0.497374	0.0028945	0.309793	0.0051489	0.164841	0.887205	0.280822	0.222146	-0.00757937	0.670828
SFRP1_P157_F	Y	8	secreted frizzled-related protein 1	0.0562608	0.0695839	0.0301193	0.650558	0.0845188	0.0776418	0.0528154	0.876186	0.0568711	0.790934	0.69145	0.328787	0.481134	0.109237	0.394614	0.0051489	0.000889889	0.0978688	0.193912	0.118635	-0.0113416	0.0465039
RUNX1T1_E145_R	N	8	acute myelogenous leukemia 1 translocation 1 protein isoform MTG8c	-0.0524848	0.499066	0.0489404	0.62967	-0.0972053	0.0527124	0.0865759	0.677217	-0.00659409	0.958394	0.11028	0.0004271	0.206623	0.0074207	0.327455	0.0382087	0.201375	0.0074841	0.182709	0.0287135	-0.109544	0.184567
GATA6_P726_F	Y	18	GATA binding protein 6	0.177549	0.0126485	0.0172483	0.0468274	0.0981198	0.652297	0.113113	0.677217	0.0345575	0.286615	0.241638	0.0698225	0.36356	0.0419702	0.264647	0.062951	0.259888	0.0825775	0.469435	0.222097	0.00605112	0.65512
SLIT2_E111_R	Y	4	slit homolog 2	0.0384167	0.630491	-0.0824068	0.0351907	-0.0221371	0.0080491	-0.00259689	1	-0.0976021	0.0035071	0.283003	0.0004271	0.32406	0.0129705	0.117213	0.0051489	0.293768	0.0072421	0.247972	0.0131781	0.0290698	0.832822
**Indicates whether the selected CpG is included (Y) or not (N) in a CpG island. Mean ß values of each selected CpG locus from the AML samples included in each cluster and controls were estimated and FDR was applied to correct p values from the t test. An FDR<0.05 was considered statistically significant.**Δß=(Mean ß value, Cluster) – (Mean ß value, BM controls). differentially Methylated CpGs ar…
